# Supplementary material for: Human-induced marine ecological degradation: micropaleontological perspectives
Source: PubMed Central journal article supplement (PMC3539015; doi:10.1002/ece3.425), 2012-11-15
Supplement: ece30002-3242-SD4.pdf [file ece30002-3242-SD4.pdf]

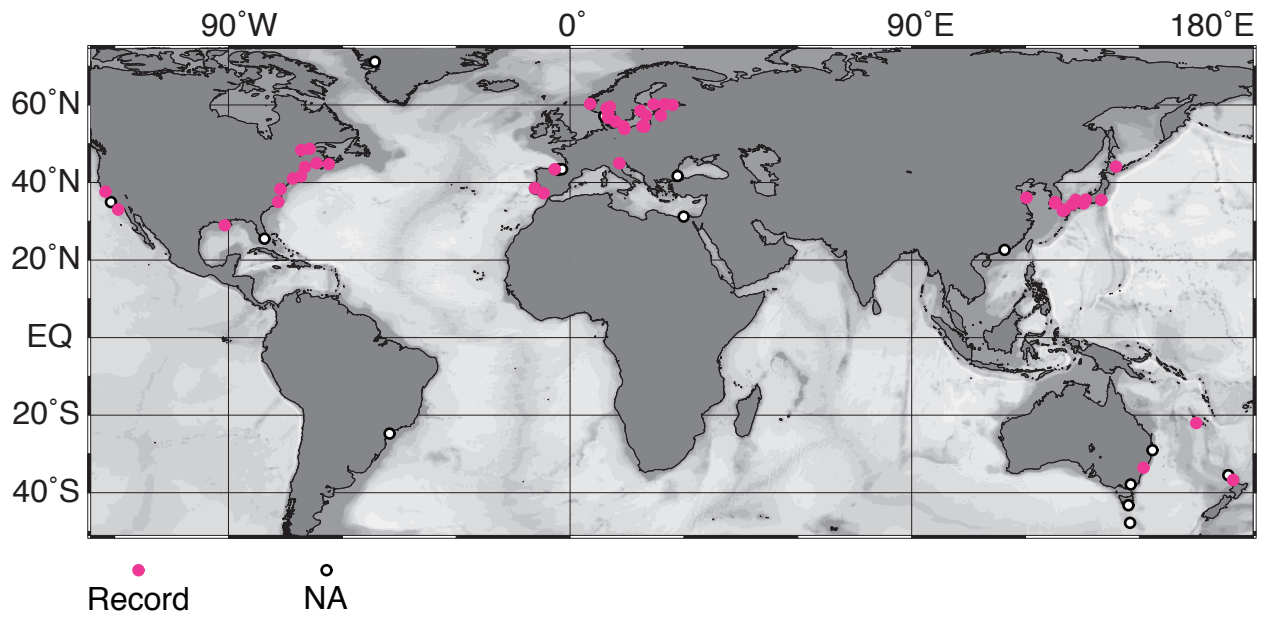

Fig. S4 Yasuhara et al.
